# Supplementary material for: Theoretical study on superalkali (Li3) in ammonia: novel alkalides with considerably large first hyperpolarizabilities
Source: Royal Society of Chemistry journal article supplement (doi:10.1039/c3dt51559a), 2013-09-24
Supplement: c3dt51559a.pdf [file c3dt51559a.pdf]

Electronic Supplementary Information for

**Theoretical study on superalkali(Li<sub>3</sub>) in ammonia: novel  
alkalides with considerably large first hyperpolarizabilities**

Wei-Ming Sun, Di Wu, Ying Li\*, Zhi-Ru Li

*Institute of Theoretical Chemistry, State Key Laboratory of Theoretical and  
Computational Chemistry, Jilin University, Changchun 130023, People's Republic of  
China. E-mail: [liyingedu@jlu.edu.cn](mailto:liyingedu@jlu.edu.cn)*

## 1. More computational details

As for the calculation of the static electric properties, the traditional B3LYP method has been recognized to overestimate the (hyper)polarizabilities for some large systems.<sup>S1</sup> In this regard, the MP2 method is more reliable but more time consuming. In recent years, some new hybrid DFT methods have been shown as suitable methods to calculate (hyper)polarizabilities for many different systems. For example, the Coulomb-attenuated hybrid exchange-correlation functional (CAM-B3LYP),<sup>S2-S6</sup> has been developed for charge transfer and long range interaction systems and the M06-2X functional recommended by Truhlar and co-workers<sup>S7</sup> has been employed to evaluate the static (hyper)polarizabilities for the long-range interaction<sup>S8</sup> and excess electron systems<sup>S9</sup>. Besides, Nakano and his co-workers pointed out that for a medium-sized system, the compromise BHandHLYP method can reproduce the (hyper)polarizabilities from the more sophisticated CCSD(T) method.<sup>S10</sup>

In order to choose an appropriate method to calculate the first hyperpolarizabilities ( $\beta_0$ ) of the investigated complexes, we computed the  $\beta_0$  value of a small analog Li(NH<sub>3</sub>)Na by using the above mentioned methods with the 6-311++G(3df, 3pd) basis set. The results are given in Table S1. Comparing with the MP2 result, the M06-2X method obviously undervalues the hyperpolarizability of this system, while the B3LYP method yields an overestimated value and the BHandHLYP lessens this overestimate. As the  $\beta_0$  value at the CAM-B3LYP level is quite close to that at the MP2 level, the CAM-B3LYP method in conjunction with 6-311++G(3df, 3pd) basis set was chosen to calculate the first hyperpolarizabilities of the investigated systems. The static mean polarizability ( $\alpha_0$ ) and mean first hyperpolarizability ( $\beta_0$ ) are defined as follows:

$$\alpha_0 = \frac{1}{3}(\alpha_{xx} + \alpha_{yy} + \alpha_{zz}) \quad (1)$$

$$\beta_0 = (\beta_x^2 + \beta_y^2 + \beta_z^2)^{1/2} \quad (2)$$

where  $\beta_i = \frac{3}{5}(\beta_{iii} + \beta_{ijj} + \beta_{ikk})$ ,  $i, j, k = x, y, z$

The total static dipole moment ( $\mu_0$ ) is noted as:

$$\mu_0 = (\mu_x^2 + \mu_y^2 + \mu_z^2)^{1/2} \quad (3)$$

## 2. Figures and tables

**Fig. S1** The NBO charges on Li atoms of  $\text{Li}_3$  and  $\text{Li}_3(\text{NH}_3)_n$  ( $n = 1-4$ ) at the B3LYP/6-311++G(3df, 3pd) level.

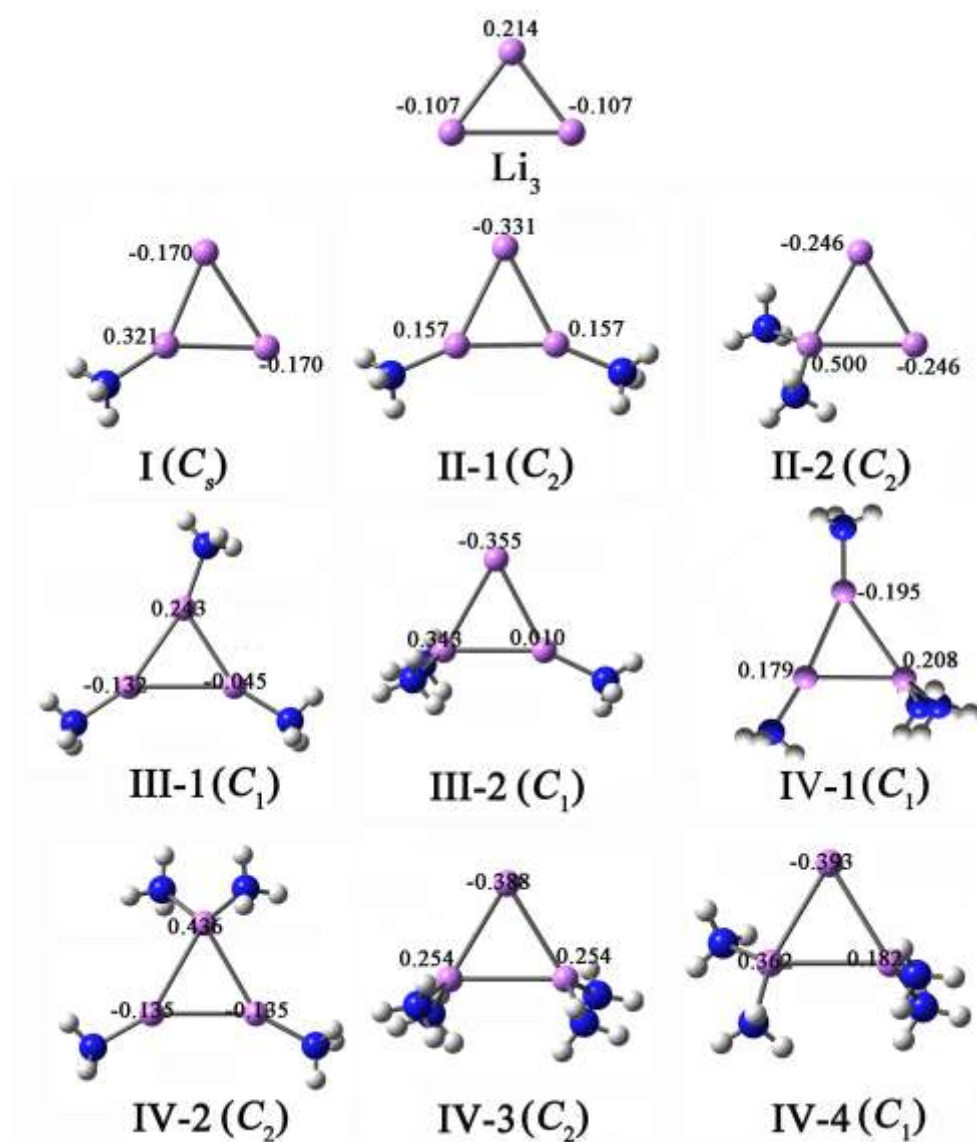

**Fig. S2** The highest occupied molecular orbitals (HOMOs) of  $\text{Li}_3$ ,  $\text{Li}_3(\text{NH}_3)_n$ , and  $\text{Li}(\text{NH}_3)_n$  ( $n = 1-4$ ).

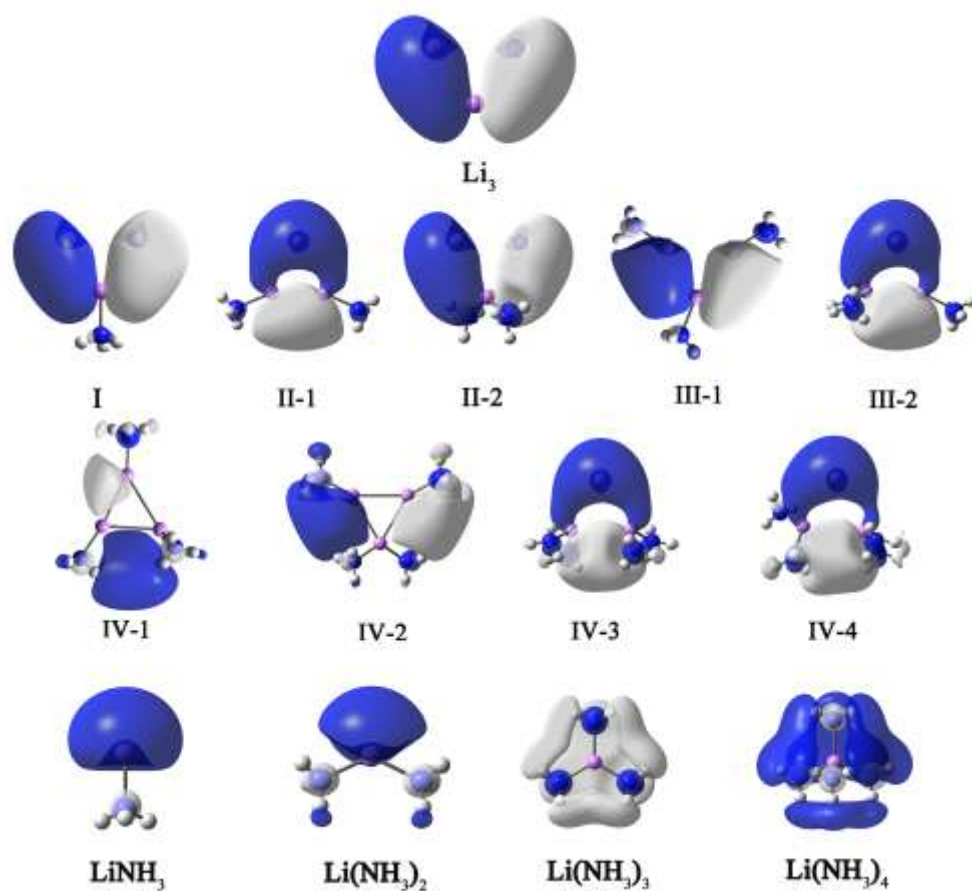

**Fig. S3** The NBO charges on Li and Na atoms of  $\text{Li}_3(\text{NH}_3)_n\text{Na}$  ( $n = 1-4$ ) at the B3LYP/6-311++G(3df, 3pd) level.

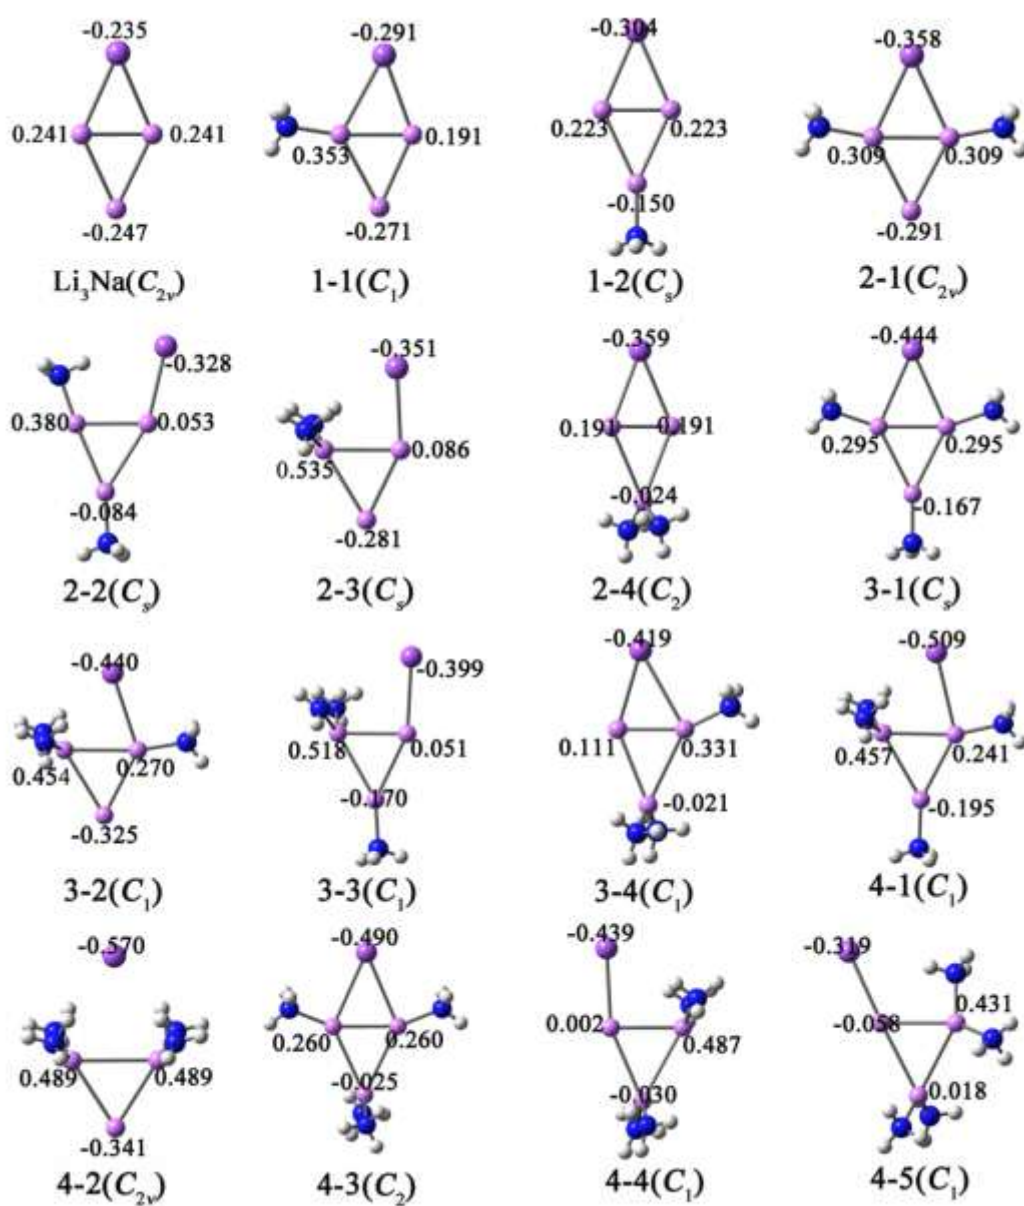

**Fig. S4** The highest occupied molecular orbitals (HOMOs) of the lowest-energy structures of  $\text{Li}_3(\text{NH}_3)_n\text{Na}$  ( $n = 1-4$ ) and  $\text{Li}_3\text{Na}$ .

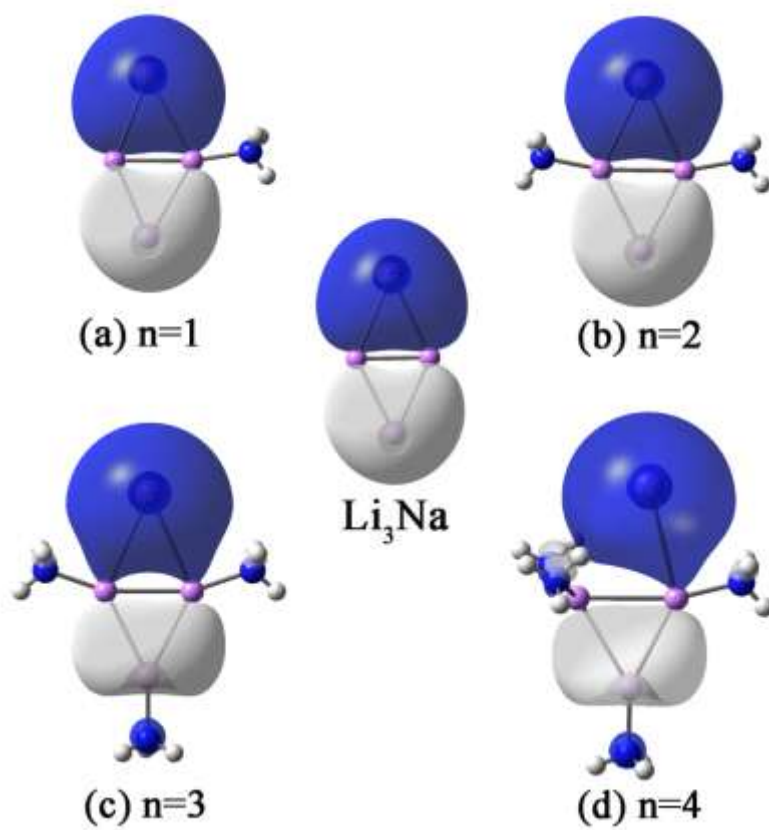

**Table S1** Calculated  $\beta_0$  values (in au) of Li(NH<sub>3</sub>)Na by different methods with 6-311++G(3df, 3pd) basis set.

| Methods   | B3LYP | MP2   | CAM-B3LYP | M06-2X | BHandHLYP |
|-----------|-------|-------|-----------|--------|-----------|
| $\beta_0$ | 17641 | 12040 | 11761     | 6858   | 13173     |

## Reference

- S1. B. Champagne, E. A. Perpète, D. Jacquemin, S. J. A. van Gisbergen, E.-J. Baerends, C. Soubra-Ghaoui and K. A. Robins, *J. Phys. Chem. A* 2000, **104**, 4755.
- S2. T. Yanai, D. P. Tew and N. C. Handy, *Chem. Phys. Lett.*, 2004, **393**, 51.
- S3. Y. Tawada, T. Tsuneda, S. Yanagisawa, T. Yanai and K. Hirao, *J. Chem. Phys.*, 2004, **120**, 8425.
- S4. M. J. G. Peach, E. I. Tellgren, T. H. P. Salek and D. J. Tozer, *J. Phys. Chem. A*, 2007, **111**, 11930.
- S5. D. Jacquemin, E. A. Perpete, G. Scalmani, M. J. Frisch, R. Kobayashi and C. Adamo, *J. Chem. Phys.*, 2007, **126**, 14405.
- S6. P. A. Limacher, K. V. Mikkelsen and H. P. Lüthi, *J. Chem. Phys.*, 2009, **130**, 194114.
- S7. (a) Y. Zhao, N. E. Schultz and D. G. Truhlar, *J. Chem. Theory Comput.*, 2006, **2**, 364. (b) Y. Zhao and D. G. Truhlar, *Theor. Chem. Acc.*, 2007, **120**, 215-241. (c) G. Sini, J. S. Sears and J.-L. Brédas, *J. Chem. Theory Comput.*, 2011, **7**, 602-.
- S8. F. Ma, Z.-R. Li, Z.-J. Zhou, D. Wu, Y. Li, Y.-F. Wang and Z.-S. Li, *J. Phys. Chem. C*, 2010, **114**, 11242.
- S9. R.-L. Zhong, H.-L. Xu, S.-L. Sun, Y.-Q. Qiu and Z.-M. Su, *Chem. -A Eur. J.*, 2012, **18**, 11350.
- S10. (a) B. Champagne, E. Botek, M. Nakano, T. Nitta and K. Yamaguchi, *J. Chem. Phys.*, 2005, **122**, 114315. (b) M. Nakano, R. Kishi, T. Nitta, T. Kubo, K. Nakasuji, K. Kamada, K. Ohta, B. Champagne, E. Botek and K. Yamaguchi, *J. Phys. Chem. A*, 2005, **109**, 885.
